# Supplementary material for: A CeO2 sprinkled graphitic novel packed bed anode-based single-chamber MFC for the treatment of high organic-loaded industrial effluent in upflow continuous mode
Source: Royal Society of Chemistry journal article supplement (doi:10.1039/d1ta06533e), 2021-01-01
Supplement: d1ta06533e1.pdf [file d1ta06533e1.pdf]

**CeO<sub>2</sub> Sprinkled Graphitic Novel Packed Bed Anode-Based Single-Chamber MFC for Treatment of High Organic-Loaded Industrial Effluent in Upflow Continuous Mode**

Komal Pandey<sup>a</sup>, Priyanka Gupta<sup>b</sup>, Nishith Verma<sup>a,b\*</sup>, Shiv Singh<sup>c,d\*</sup>

<sup>a</sup>Center for Environmental Science and Engineering, Indian Institute of Technology Kanpur, Kanpur 208016, India

<sup>b</sup>Department of Chemical Engineering, Indian Institute of Technology Kanpur, Kanpur 208016, India

<sup>c</sup>Industrial waste utilization, nano and biomaterial division, CSIR- Advanced Materials and Processes Research Institute (CSIR-AMPRI), Hoshangabad Road, Bhopal, Madhya Pradesh-462026, India

<sup>d</sup>Academy of Scientific and Innovative Research (AcSIR), Ghaziabad, 201002, India

\*Corresponding authors

Prof. Nishith Verma; email id: vermanishith@gmail.com

Dr. Shiv Singh: email id: sshiv.singh@ampri.res.in; sshiviitk@gmail.com

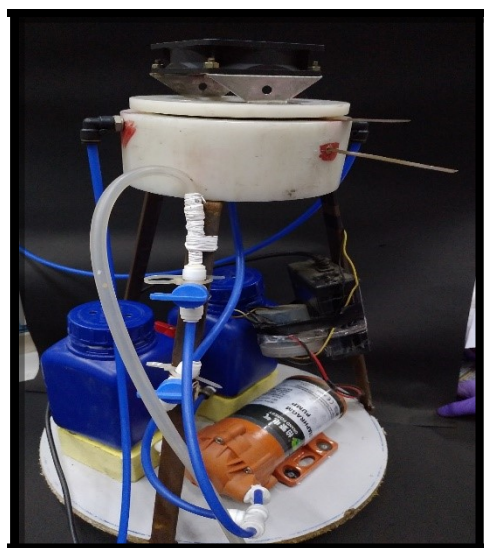

Conical SCMFC front side view

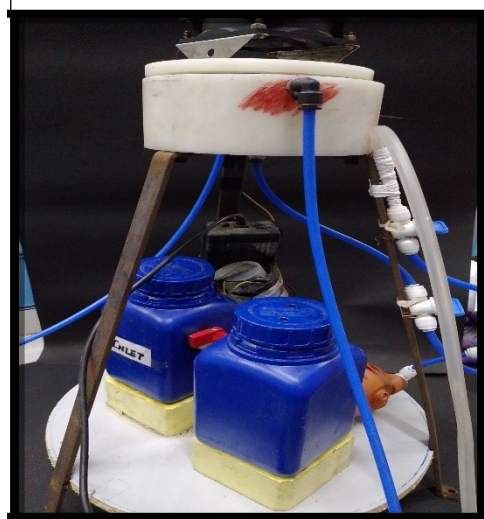

Conical SCMFC back side view

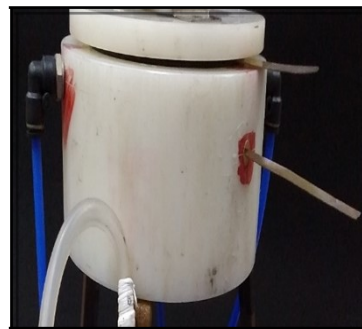

Teflon case which consists anode chamber

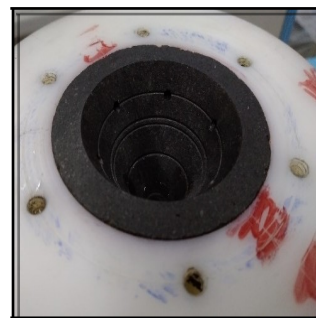

Top view of anode chamber with SS

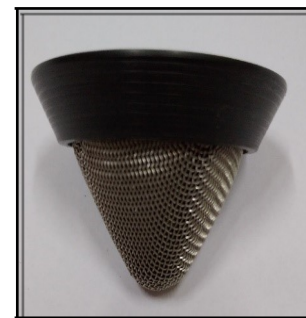

SS basket for holding  $\text{CeO}_2\text{-CNF/ACB}$

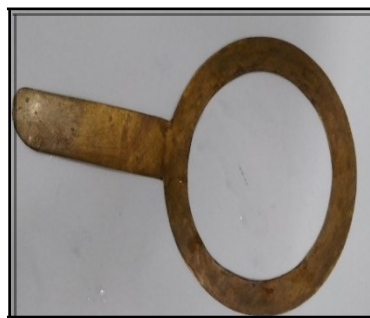

Connector for P- $\text{CeO}_2\text{-CNF/ACF}$  air cathode

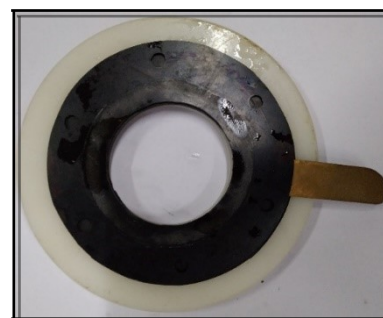

Connector with gasket for holding P- $\text{CeO}_2\text{-CNF/ACF}$  air cathode along with Teflon lid

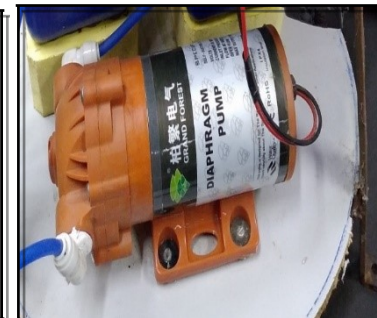

Pump for water circulation

Fig. S1. Photograph of real set-up and components of conical SCMFC.

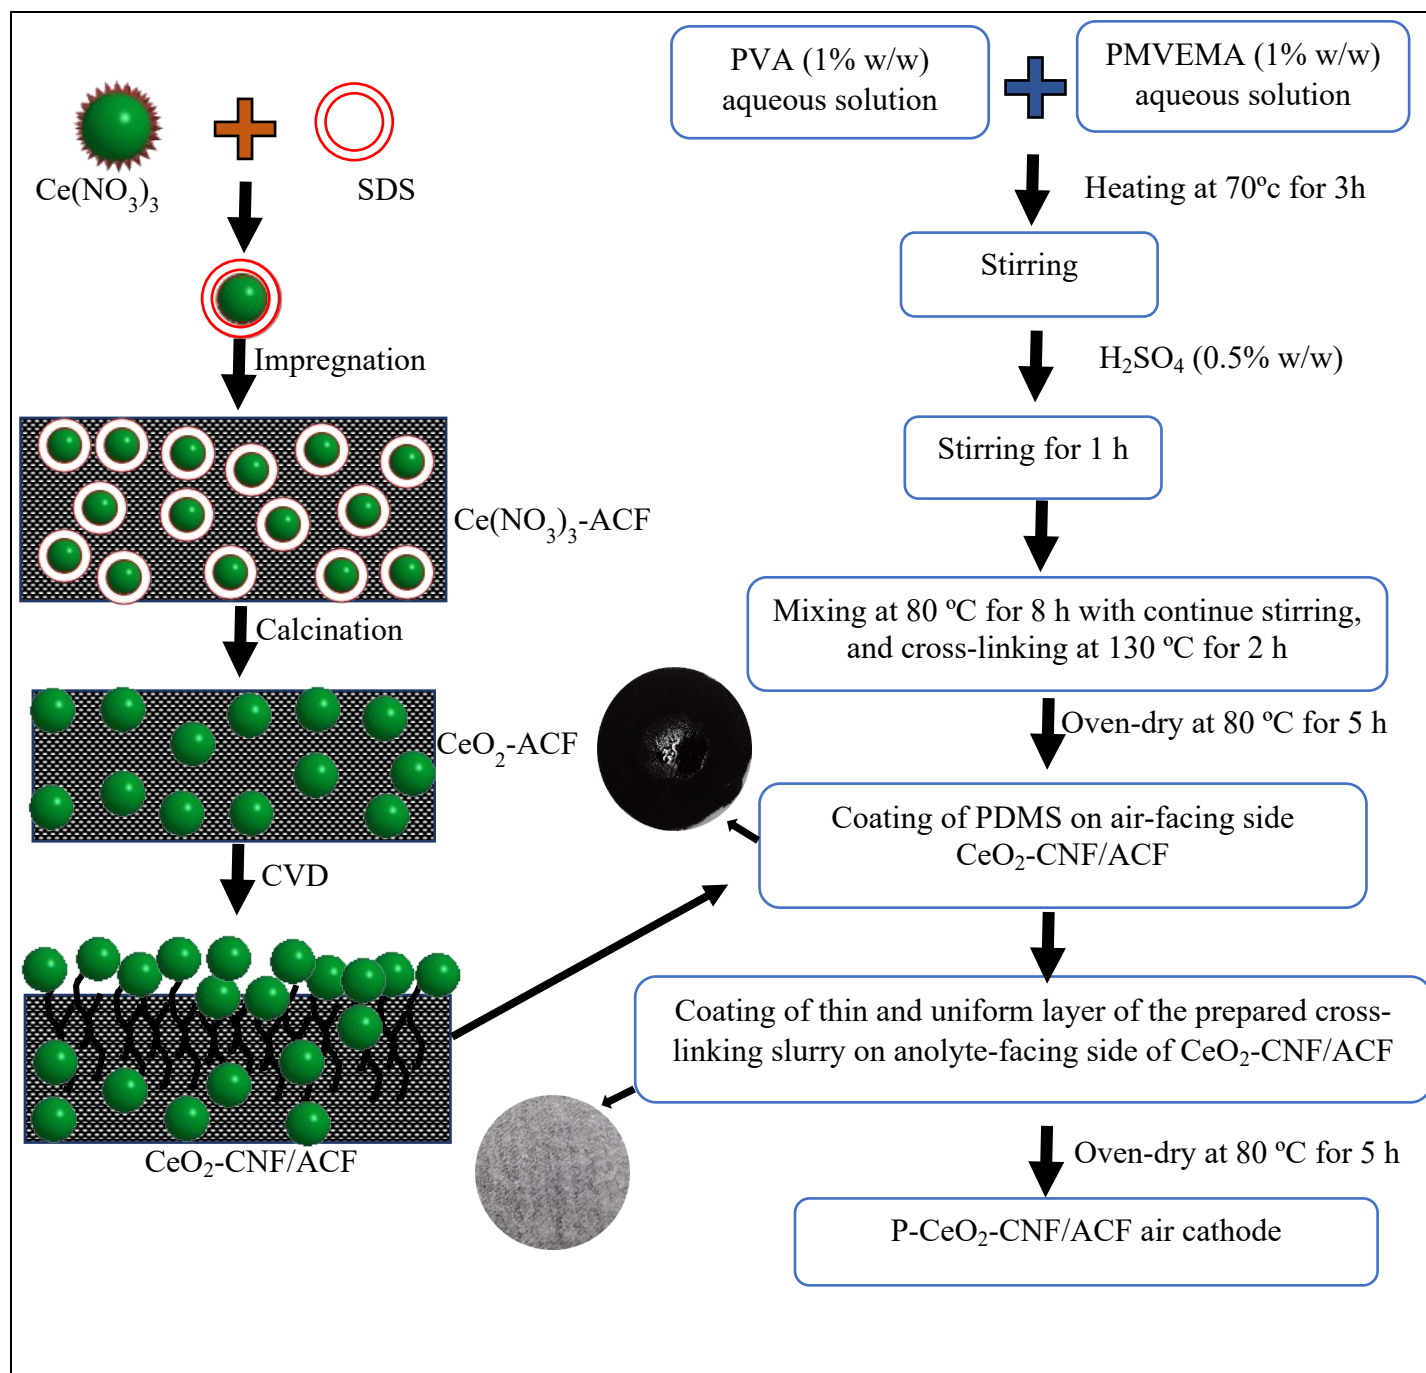

Fig. S2. Flow chart for the synthesis of  $\text{CeO}_2\text{-CNF/ACF}$  and  $\text{P-CeO}_2\text{-CNF/ACF}$  air cathode.

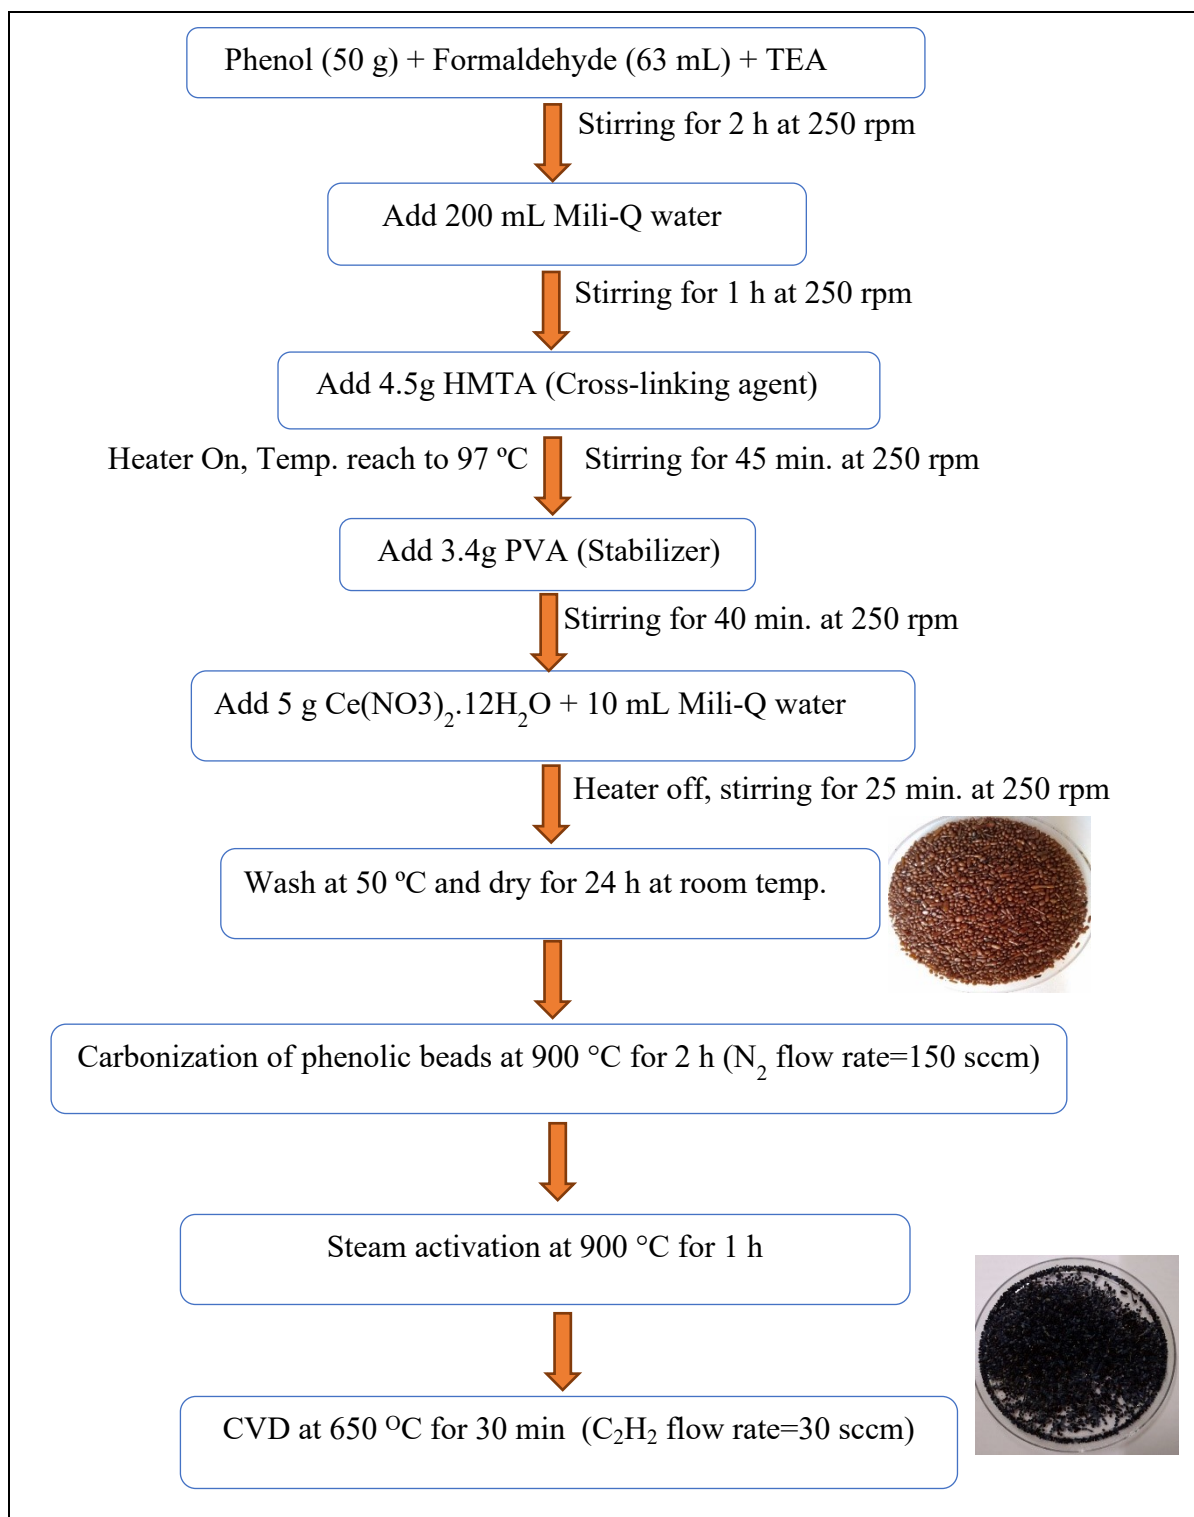

Fig. S3. Flow chart for the synthesis of CeO<sub>2</sub>-CNF/ACB.

Table S1. Thermal power plant effluent water quality parameters

| Parameters                        | Quantity   |
|-----------------------------------|------------|
| pH                                | 9.60       |
| TOC (Total Organic Carbon, mg/L)  | 15140      |
| TC (Total Carbon, mg/L)           | 15660      |
| IC (Inorganic carbon, mg/L)       | 5177       |
| TN (Total Nitrogen, mg/L)         | 5071       |
| Electric Conductivity (EC, mS/cm) | 5.70       |
| COD (mg/L)                        | 20700      |
| Colour                            | Dark brown |
| CFU/mL                            | 50.00      |
| Na content (mg/L)                 | 1500.00    |
| Phosphate (mg/L)                  | 0.63       |
| Fluoride (mg/L)                   | 5.32       |
| Cadmium (mg/L)                    | 0.64       |
| Copper (mg/L)                     | 0.16       |
| Lead (mg/L)                       | 0.42       |
| Zinc (mg/L)                       | 3.46       |

Table S2.  $S_{\text{BET}}$ ,  $V_{\text{T}}$  and PSD of the prepared materials

| Sample                    | $S_{\text{BET}}$ ( $\text{m}^2/\text{g}$ ) | $V_{\text{T}}$ ( $\text{cc/g}$ ) | $V_{\text{micro}}$ (%) | $V_{\text{meso-macro}}$ (%) |
|---------------------------|--------------------------------------------|----------------------------------|------------------------|-----------------------------|
| ACF                       | 1050                                       | 0.67                             | 82.91                  | 17.09                       |
| CeO <sub>2</sub> -CNF/ACF | 545                                        | 0.33                             | 83.13                  | 16.87                       |
| CeO <sub>2</sub> -PhB     | 0                                          | 0.00                             | 0.00                   | 0.00                        |
| CeO <sub>2</sub> -CNF/ACB | 371                                        | 0.25                             | 72.02                  | 27.98                       |

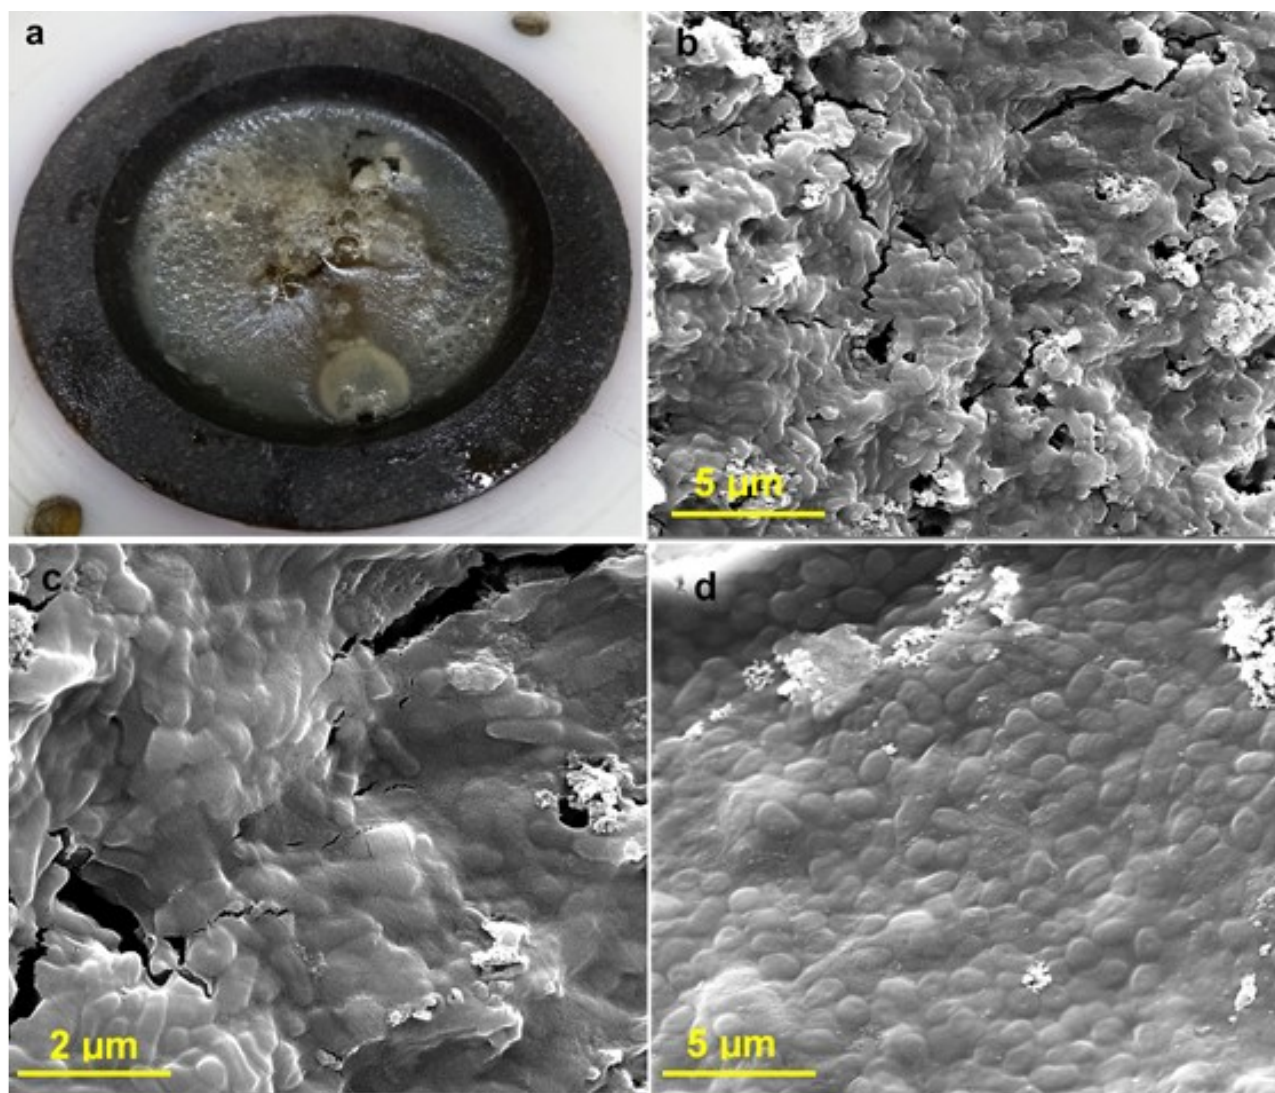

Fig. S4. (a) Digital image of the top view of biofilm in the anode chamber, (b-d) SEM images of biofilm grown in different regions over the packed beads.

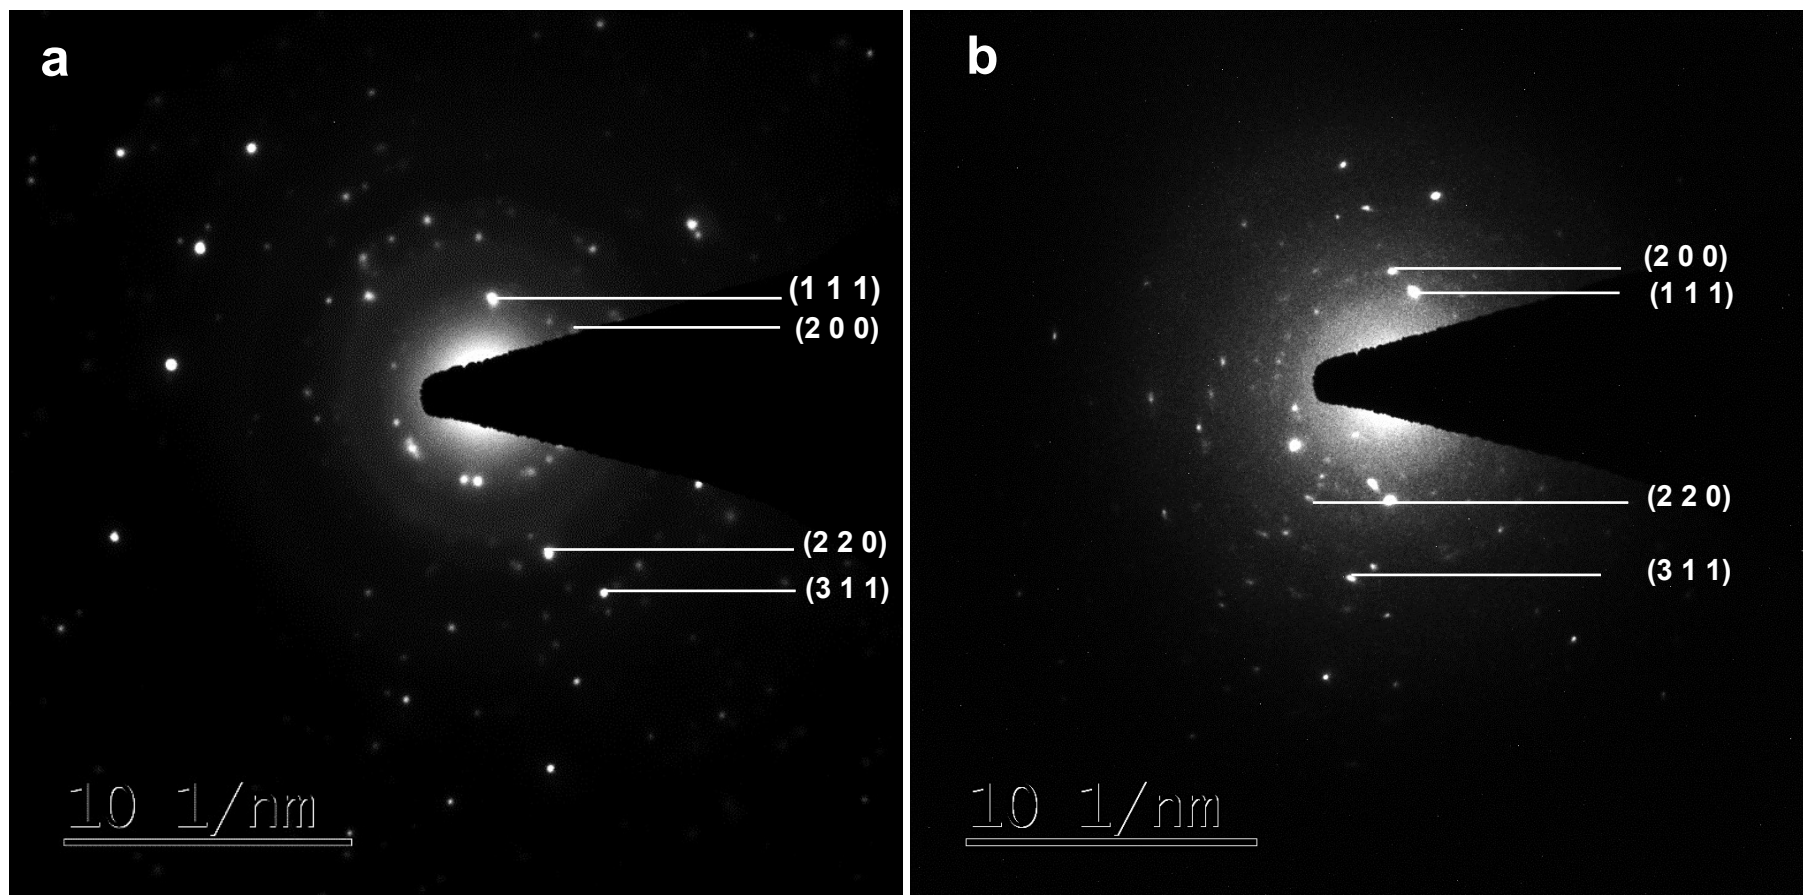

Fig. S5. SAED pattern of (a)  $\text{CeO}_2$ -CNF grown on ACB (anode) and (b)  $\text{CeO}_2$ -CNF grown on ACF (cathode) along with the corresponding (h k l) values determined from d-spacing.

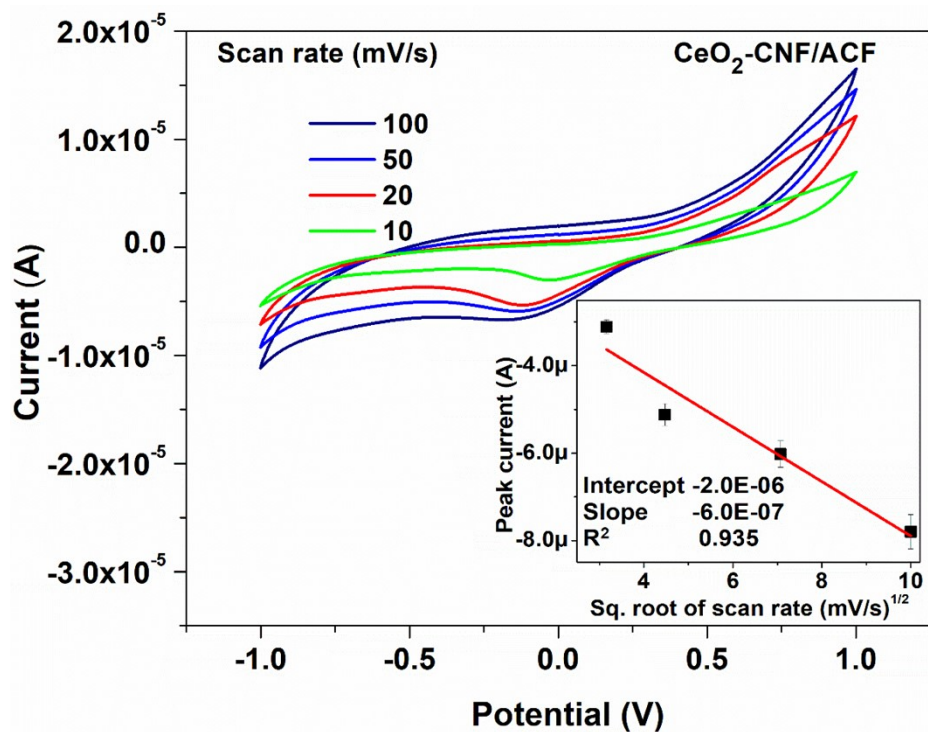

Fig. S6. The cyclic voltammogram for CeO<sub>2</sub>-CNF/ACF at different scan rates, and the plot (inset) for cathodic peak current vs. square root of scan rate (Randles-Sevcik equation).

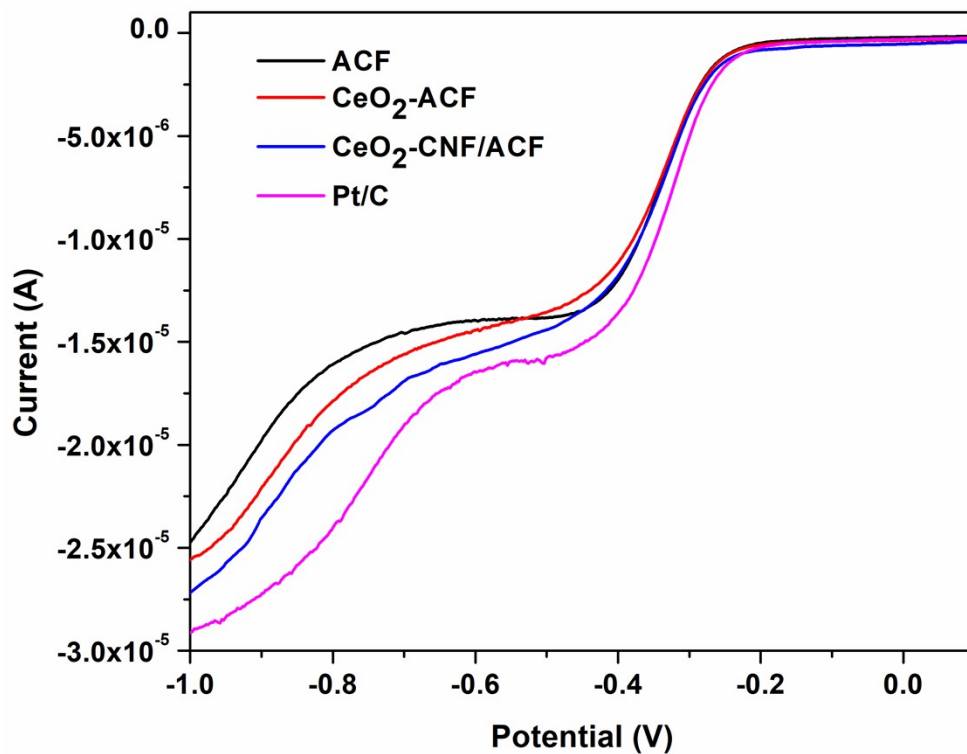

Fig. S7. ORR polarization curves for ACF, CeO<sub>2</sub>-ACF, CeO<sub>2</sub>-CNF/ACF and Pt/C (5 wt% Pt on activated carbon) in the oxygen saturated 1M KOH at RDE speed of 1000 rpm and scan rate of 10 mV/s.

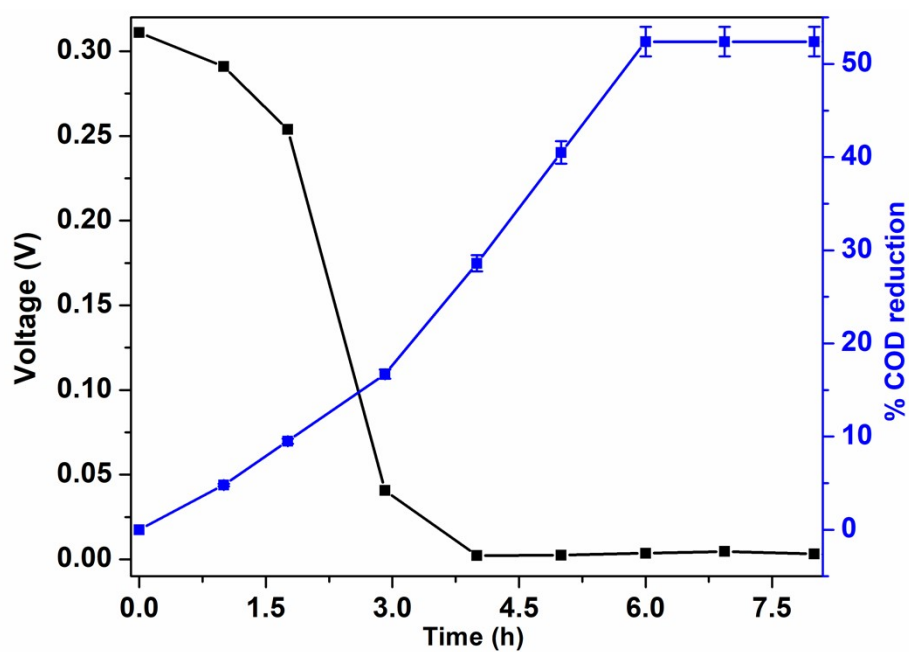

Fig. S8 Generated voltages and percentage COD reductions using ACB (viz. substrate without  $\text{CeO}_2$ ) as the packed bed anode and  $\text{CeO}_2\text{-CNF/ACF}$  as the cathode at 51 min of HRT.

Table S3: Evaluation of the performance of the present study with literature

| S. No. | Type of MFC       | Type of effluent                                  | COD (mg/L)    | Chamber volume (mL)                                 | Anode // Cathode                                          | External resistance | Flow rate (mL/min)        | HRT (h)                    | % COD reduction  | Voltage (mV) | Power density (mW/m <sup>2</sup> ) | Ref |
|--------|-------------------|---------------------------------------------------|---------------|-----------------------------------------------------|-----------------------------------------------------------|---------------------|---------------------------|----------------------------|------------------|--------------|------------------------------------|-----|
| 1      | SCMFC             | Refinery wastewater                               | 4500 - 5000   | 500                                                 | Stainless steel mesh 300 // Carbon cloth                  | 100                 |                           | 15                         | 44               | 785          | 113                                | 19  |
| 2      | DCMFC             | Synthetic swine wastewater containing antibiotics | 3000          | 350                                                 | Cylindrical graphite felt // carbon-fiber brush           | 1000                |                           | 24                         | 90.9-93.5        | 630 - 720    |                                    | 20  |
| 3      | Three-chamber MFC | Synthetic wastewater                              | 705           | anode (1100), cathode (1600), and a clarifier (900) | Carbon felt // iron(II) phthalocyanine (FePc)-carbon felt | 1000                | 0.83                      | 72                         | 87               | 547          | 9.3                                | 21  |
| 4      | SCMFC             | Meat wastewater samples                           | 1357.6 ± 78.6 | 930                                                 | Carbon brush // Plain carbon cloth                        | 27                  |                           | 77, 25 and 15              | 28.2, 38.6, 69.0 | 520          | 3000 mW/m <sup>3</sup>             | 22  |
| 5      | DCMFC             | Artificial municipal wastewater                   | 300 ± 15      | 350                                                 | Cylinder-shaped graphite felt // carbon-fiber brush       | 1000                | 0.35, 0.47, 0.59 and 0.70 | 16.56, 12.48, 9.84 and 8.4 | 92.4 – 94.4      | 599          | 253.84                             | 23  |

|    |       |                         |            |                                       |                                                        |       |                |               |            |       |                         |               |
|----|-------|-------------------------|------------|---------------------------------------|--------------------------------------------------------|-------|----------------|---------------|------------|-------|-------------------------|---------------|
| 6  | DCMFC | Synthetic wastewater    | 1500       | 296                                   | Graphite rods covered with carbon cloth                | 100   | 0.05           | 0.41          | 55-60      | 600   | 188                     | <sup>24</sup> |
| 7  | DCMFC | Chocolaterie wastewater | 3800 ± 150 | Cathode (600) and (500)               | Carbon veil                                            |       | 0.2375 - 0.833 | 15            | 70         | 540   | 98                      | <sup>25</sup> |
| 8  | DCMFC | Synthetic wastewater    | 6500       | Anode (10.66 L) and cathode (9.96 L). | Plain porous carbon paper                              | 100   |                | 22.78 – 24.57 | 88.53      | 816.8 | 62.94 mW/m <sup>3</sup> | <sup>26</sup> |
| 9  | DCMFC | Synthetic wastewater    | 30000      | 800                                   | Graphite plate                                         | 1000  |                | 6.7           |            | 440   | 283                     | <sup>27</sup> |
| 10 | DCMFC | Brewery wastewater      | 3197 ± 979 | Anode (10 L) and cathode (30 L)       | Carbon fiber cloth                                     | 10000 | 1, 2 and 3     | 313           | 94.6 ± 1.0 |       | 1.61                    | <sup>28</sup> |
| 11 | SCMFC | Thermal power plant     | ~21000     | 51                                    | CeO <sub>2</sub> -CNF/ACB // CeO <sub>2</sub> -CNF/ACF | 100   | 1, 3 and 5     | 0.85          | 76         | 341   | 424 mW/m <sup>3</sup>   | This study    |
